# Supplementary material for: Disease Activity and Health-related Quality of Life Relationships with Work Productivity in Patients with Ulcerative Colitis in OCTAVE Induction 1 and 2 and OCTAVE Sustain
Source: PubMed Central journal article supplement — J Crohns Colitis. 2022 Oct 22;17(4):513–23. doi: 10.1093/ecco-jcc/jjac161 (PMC10115234; doi:10.1093/ecco-jcc/jjac161), 2022-10-22
Supplement: jjac161_suppl_supplementary_figure_s1.pdf [file jjac161_suppl_supplementary_figure_s1.pdf]

**Supplementary Figure 1.** Estimated relationship between the Mayo subscores as continuous or categorical anchors and the four WPAI-UC components.

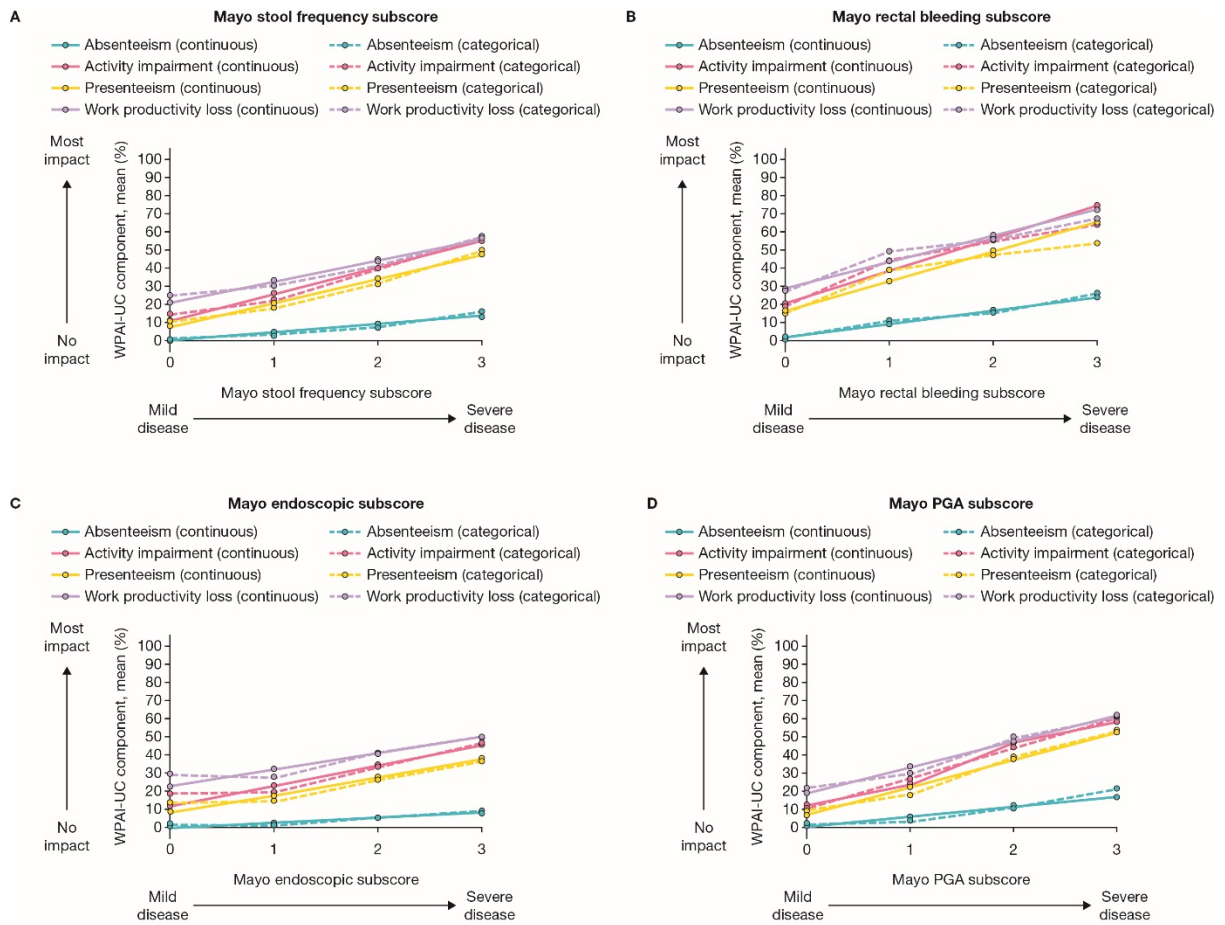

PGA, Physician Global Assessment; WPAI-UC, Work Productivity and Activity Impairment-Ulcerative Colitis. Data from OCTAVE Induction 1 and 2 and OCTAVE Sustain; all treatment groups from each Phase 3 study were pooled for analysis. WPAI-UC component scores are expressed as percentages, with a higher percentage indicating greater impairment and less productivity. The total Mayo score ranges from 0 to 12 points and each subscore ranges from 0 to 3 points; higher scores indicate more severe disease activity for both total and individual subscores.
