# Supplementary material for: Disease Activity and Health-related Quality of Life Relationships with Work Productivity in Patients with Ulcerative Colitis in OCTAVE Induction 1 and 2 and OCTAVE Sustain
Source: PubMed Central journal article supplement — J Crohns Colitis. 2022 Oct 22;17(4):513–23. doi: 10.1093/ecco-jcc/jjac161 (PMC10115234; doi:10.1093/ecco-jcc/jjac161), 2022-10-22
Supplement: jjac161_suppl_supplementary_table_s1.pdf [file jjac161_suppl_supplementary_table_s1.pdf]

**Supplementary Table 1.** Number of evaluable patients in each analysis.

|                                               | <b>WPAI-UC component</b> |                     |                               |                            |
|-----------------------------------------------|--------------------------|---------------------|-------------------------------|----------------------------|
|                                               | <b>Absenteeism</b>       | <b>Presenteeism</b> | <b>Work productivity loss</b> | <b>Activity impairment</b> |
| Total Mayo score                              | 1156                     | 1210                | 986                           | 1750                       |
| Mayo stool frequency subscore                 | 1156                     | 1210                | 986                           | 1750                       |
| Mayo rectal bleeding subscore                 | 1156                     | 1210                | 986                           | 1750                       |
| Mayo endoscopic subscore                      | 1158                     | 1212                | 988                           | 1750                       |
| Mayo PGA subscore                             | 1158                     | 1212                | 988                           | 1750                       |
| IBDQ (total score and all individual domains) | 1158                     | 1212                | 988                           | 1750                       |

IBDQ, Inflammatory Bowel Disease Questionnaire; PGA, Physician Global Assessment; WPAI-UC, Work

Productivity and Activity Impairment-Ulcerative Colitis.

Data from OCTAVE Induction 1 and 2 and OCTAVE Sustain; all treatment groups from each Phase 3 study were pooled for analysis.
